# Supplementary material
Source: publisher figshare collection journal article supplement (https://acs.figshare.com/ndownloader/files/4145827)

## **SUPPLEMENTARY MATERIAL**

### **A 4D structure-activity study of HIV-1 integrase strand transfer inhibitors through a LQTA-QSAR approach**

Eduardo B. de Melo<sup>a</sup>, Márcia M. C. Ferreira<sup>b\*</sup>.

<sup>a</sup>Theoretical Medicinal and Environmental Chemistry Laboratory (LQMAT),  
Department of Pharmacy, Western Parana State University – Unioeste, 2069  
Universitaria St, Cascavel, PR, 85819-110, Brazil.

<sup>b</sup>Laboratory for Theoretical and Applied Chemometrics (LQTA), Institute of Chemistry,  
University of Campinas – UNICAMP, P.O. Box 6154, Campinas, SP, 13084-971,  
Brazil.

\*Corresponding author. Email: [marcia@iqm.unicamp.br](mailto:marcia@iqm.unicamp.br)

## INFORMATION S1: STRUCTURE OF THE STUDIED COMPOUNDS.

Note: the numbers are the  $pIC_{50}$  ( $-\log IC_{50}$ ).

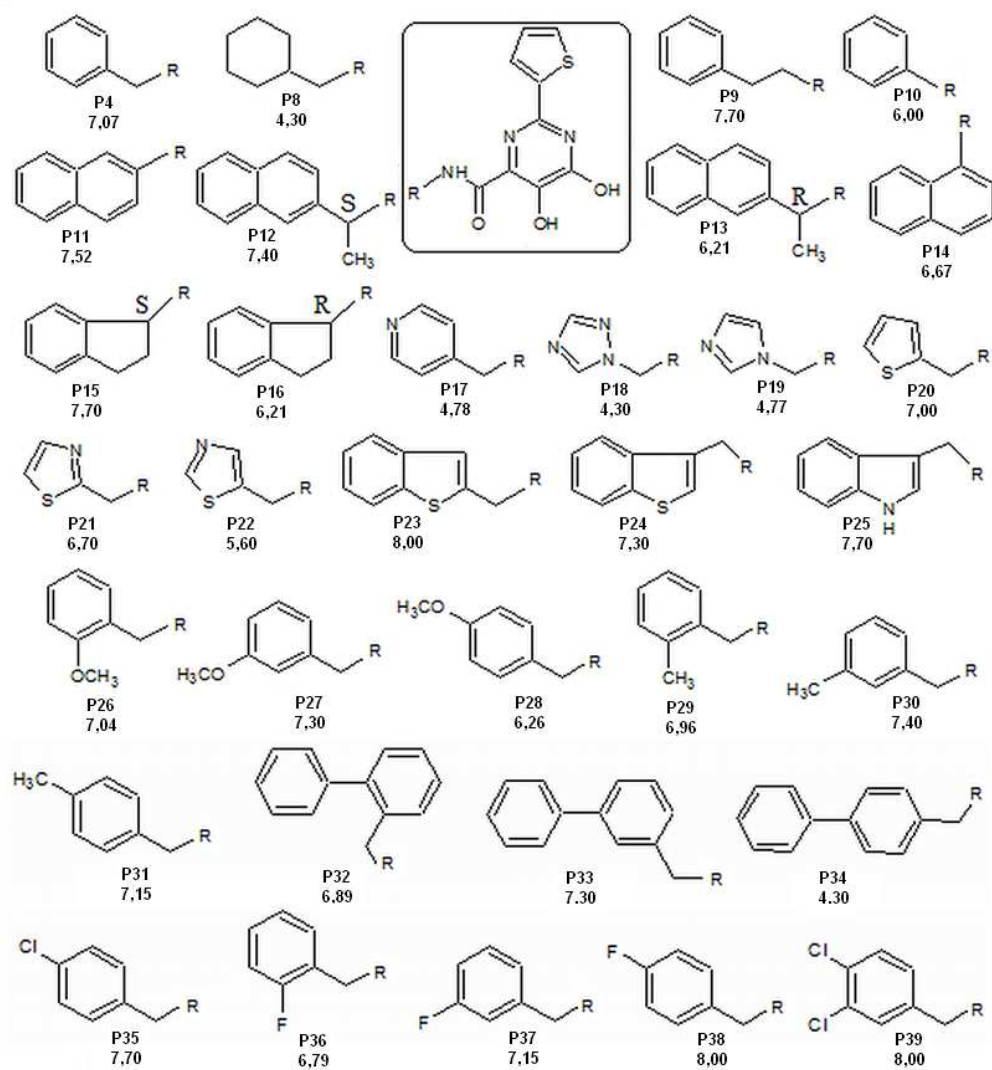

From ref. 12

S11

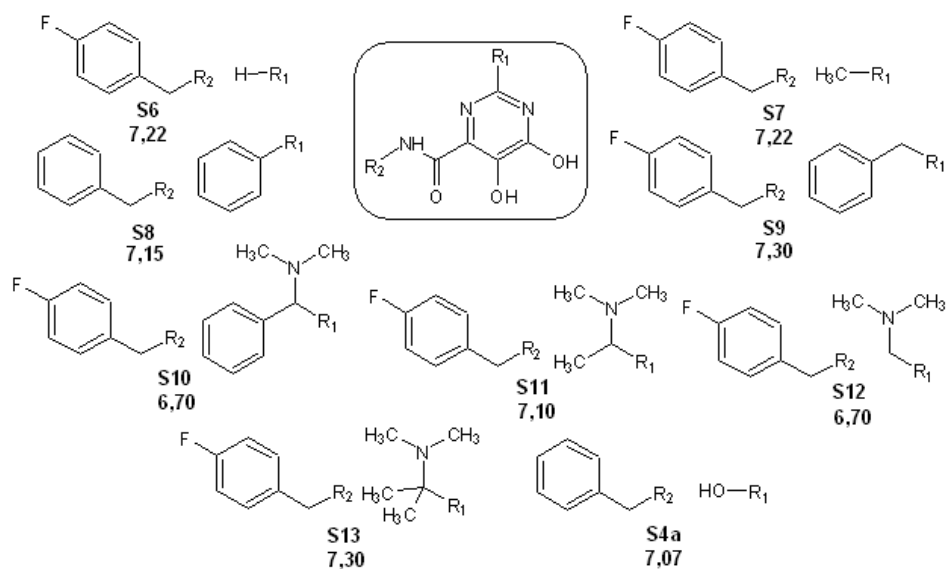

From ref. 18

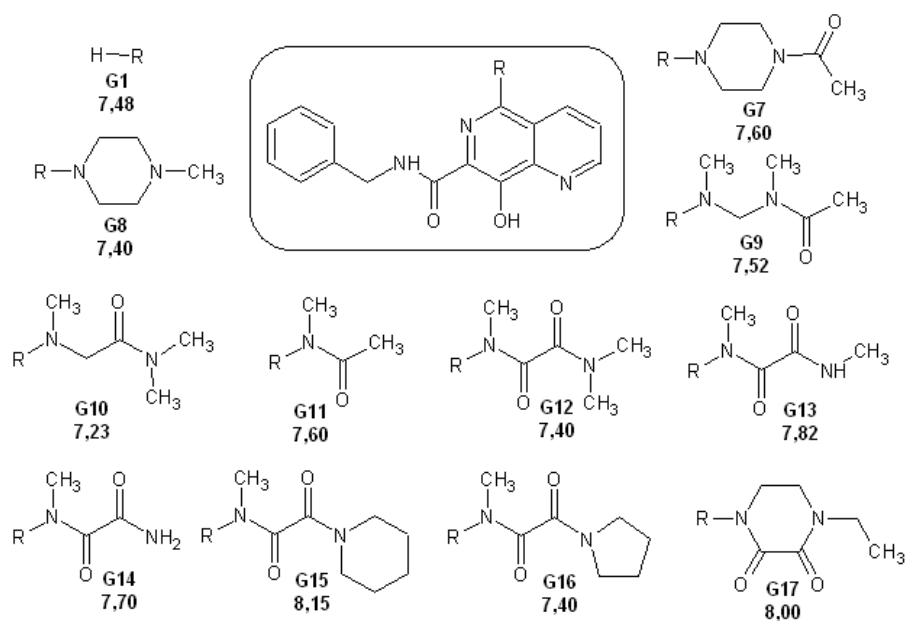

From ref. 19

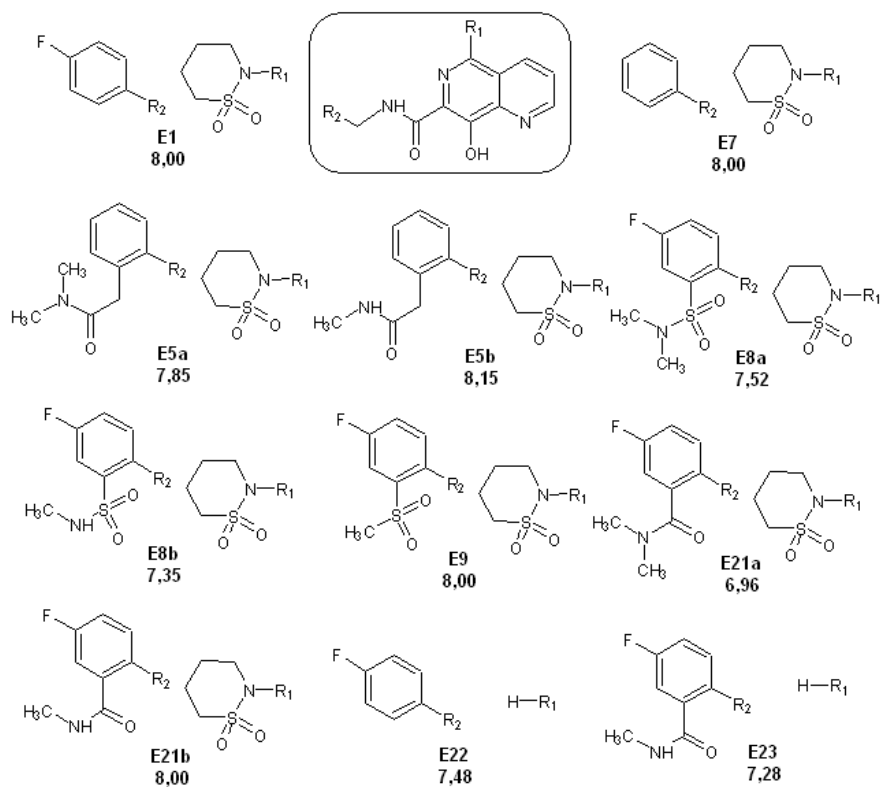

From ref. 20

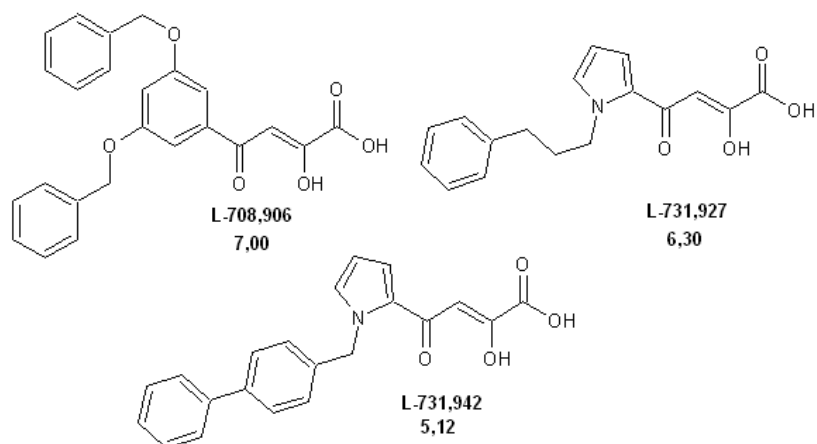

From ref. 21

SI3

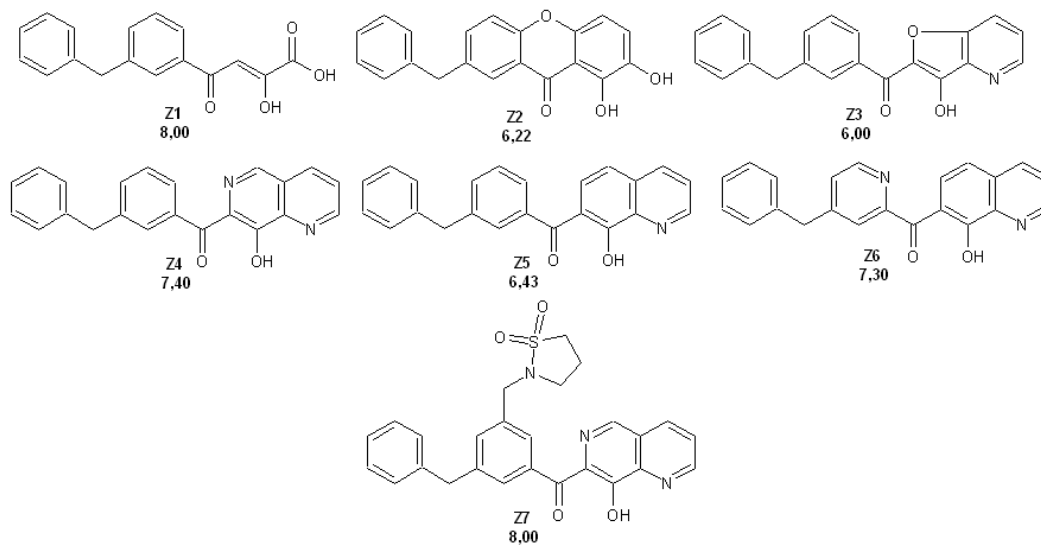

From ref. 22

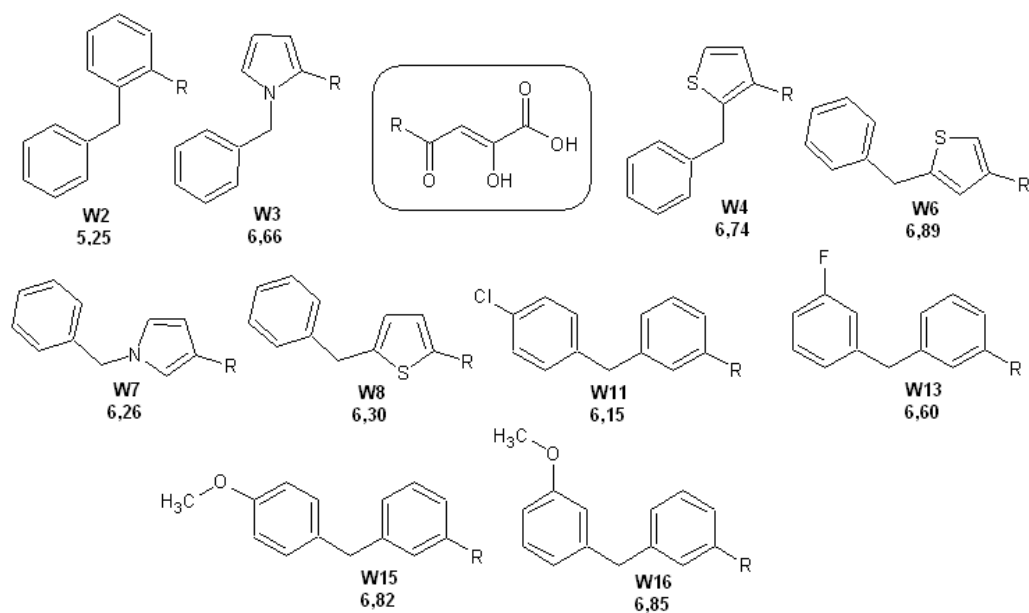

From ref. 23

**INFORMATION S2: CRYSTALLOGRAPHIC STRUCTURES SELECTED FROM THE CAMBRIDGE STRUCTURAL DATABASE (CSD) THAT WERE USED AS BASIS FOR THE CONSTRUCTION OF THE TRAINING SET. THE NAMES OF EACH STRUCTURE CORRESPOND TO YOUR SPECIFIC CODE IN CSD.**

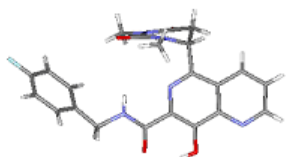

GEDKUW  
R-factor: 6.79%  
Average sigma: 0.001-0.005 Å

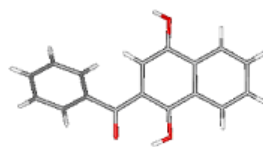

LUCFAQ  
R-factor: 7.35%  
Average sigma: 0.001-0.005 Å

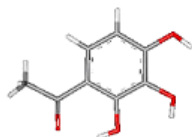

DOTRUZ  
R-factor: 4.40%  
Average sigma: 0.001-0.005 Å

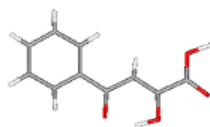

XEPJIL  
R-factor: 4.50%  
Average sigma: 0.001-0.005 Å

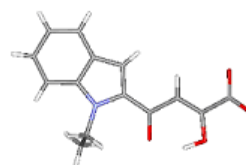

RALTUU  
R-factor: 3.98%  
Average sigma: 0.001-0.005 Å

### INFORMATION S3: VALIDATION TOOLS

**Table S1.** Statistics parameters, respective equations, and adopted limits for the assessment of the internal quality of the model.

| Parameter                                                                   | Symbol           | Equation                                                                                                   | Limits                                   |
|-----------------------------------------------------------------------------|------------------|------------------------------------------------------------------------------------------------------------|------------------------------------------|
| Coefficient of multiple determination of calibration <sup>a</sup>           | $R^2$            | $1 - \frac{\sum_i (y_i - \hat{y}_{ci})^2}{\sum_i (y_i - \bar{y})^2}$                                       | $> 0.6$                                  |
| Standard deviation of calibration model <sup>a</sup>                        | $SEC$            | $\sqrt{\frac{\sum_i (y_i - \hat{y}_{ci})^2}{n - p - 1}}$                                                   | As much lower as possible                |
| $F$ -test (with 95% confidence interval) <sup>a</sup>                       | $F_{(p, n-p-1)}$ | $\frac{\sqrt{\frac{\sum_i (y_i - \hat{y}_{ci})^2}{k}}}{\sqrt{\frac{\sum_i (y_i - \bar{y})^2}{n - p - 1}}}$ | Higher than the tabulated critical value |
| Coefficient of determination of leave-one-out cross validation <sup>b</sup> | $Q^2_{LOO}$      | $1 - \frac{\sum_i (y_i - \hat{y}_{vi})^2}{\sum_i (y_i - \bar{y})^2}$                                       | $> 0.5$                                  |
| Standard error of cross validation <sup>b</sup>                             | $SEV$            | $\sqrt{\frac{\sum_i (y_i - \hat{y}_{vi})^2}{n}}$                                                           | As much lower as possible                |
| Predictive Residual Sum of Squares of Validation <sup>b</sup>               | $PRESS_{val}$    | $\sum_i (y_i - \hat{y}_{vi})^2$                                                                            | Higher than $S_{sy}$                     |

<sup>a</sup>Data fit; <sup>b</sup>cross validation;  $y_i$ : observed  $pIC_{50}$ ;  $\bar{y}$ : average observed  $pIC_{50}$  for the training set;  $\hat{y}_{ci}$ : estimated  $pIC_{50}$  in the calibration model;  $\hat{y}_{vi}$ : estimated  $pIC_{50}$  in the cross-validation;  $n$ : number of samples in the training set;  $p$ : number of latent variables in the model.

**Table S2.** Statistics parameters, corresponding equations, and adopted limits for the evaluation of the external quality of the model.

| Parameter                                                                                                                                                                            | Symbol       | Equation                                                                  | Limits                    |
|--------------------------------------------------------------------------------------------------------------------------------------------------------------------------------------|--------------|---------------------------------------------------------------------------|---------------------------|
| Coefficient of multiple determination of prediction <sup>a</sup>                                                                                                                     | $R^2_{pred}$ | $1 - \frac{\sum_i (y_i - \hat{y}_{ei})^2}{\sum_i (y_i - \bar{y}_{ev})^2}$ | $\square 0.5$             |
| Standard error of prediction                                                                                                                                                         | $SEP$        | $\sqrt{\frac{\sum_i (y_i - \hat{y}_{ei})^2}{n_{ev}}}$                     | As much lower as possible |
| Average relative error of prediction                                                                                                                                                 | $ARE_{pred}$ | $\frac{\sum_i  y_i - \hat{y}_{ei} ^2}{y_i} \cdot 100$                     | As much lower as possible |
| Slopes of the linear regression lines                                                                                                                                                | $k$ and $k'$ | $\frac{\sum_i (y_i - \hat{y}_{ei})}{\sum_i y_{ei}}$                       | $0.85 \leq x \leq 1.15$   |
|                                                                                                                                                                                      |              | and                                                                       |                           |
|                                                                                                                                                                                      |              | $\frac{\sum_i (y_i - \hat{y}_{ei})}{\sum_i y_i}$                          | $(x = k \text{ or } k')$  |
| The absolute value of the difference between the coefficient of determination between $y_{obsi}$ and $y_{evi}$ and the coefficient of determination between $y_{evi}$ and $y_{obsi}$ |              | $ R_0^2 - R'^2_0 $                                                        | $< 0.3$                   |

<sup>a</sup>For  $R^2_{pred}$ ,  $\bar{y}_{ev}$  is the average value of observed pIC<sub>50</sub> for the training set without the test set;  $y_i$ : observed pIC<sub>50</sub>;  $\hat{y}_{ei}$ : estimated pIC<sub>50</sub> in the external validation;  $n$ : number of samples in the training set;  $n_{ev}$ : number of samples in the test set.

## INFORMATION S4: OUTLIERS

| Outliers |                                                                                     | pIC <sub>50</sub> |
|----------|-------------------------------------------------------------------------------------|-------------------|
| P9       | 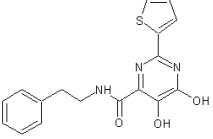   | 7.700             |
| P15      | 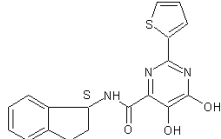   | 7.700             |
| P18      | 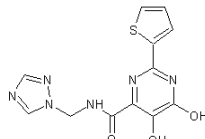   | 4.300             |
| P22      | 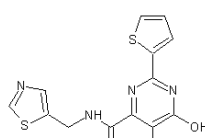  | 5.600             |
| P26      | 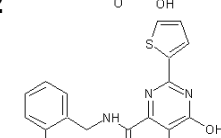 | 7.040             |
| P34      | 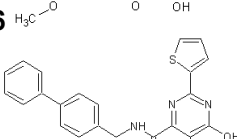 | 4.300             |
| W2       | 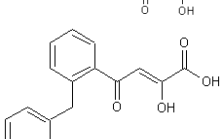 | 5.250             |
| W3       | 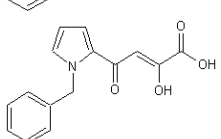 | 6.660             |
| L708906  | 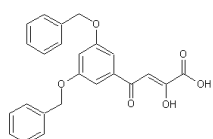 | 7.000             |

**INFORMATION S5: DENDROGRAM (AUTOSCALED DATA; LINKAGE METHOD FLEXIBLE) OF THE COMPLETE TRAINING SET. THE TEST SET IS SHOWN DETACHED (BLACK DOTS).**

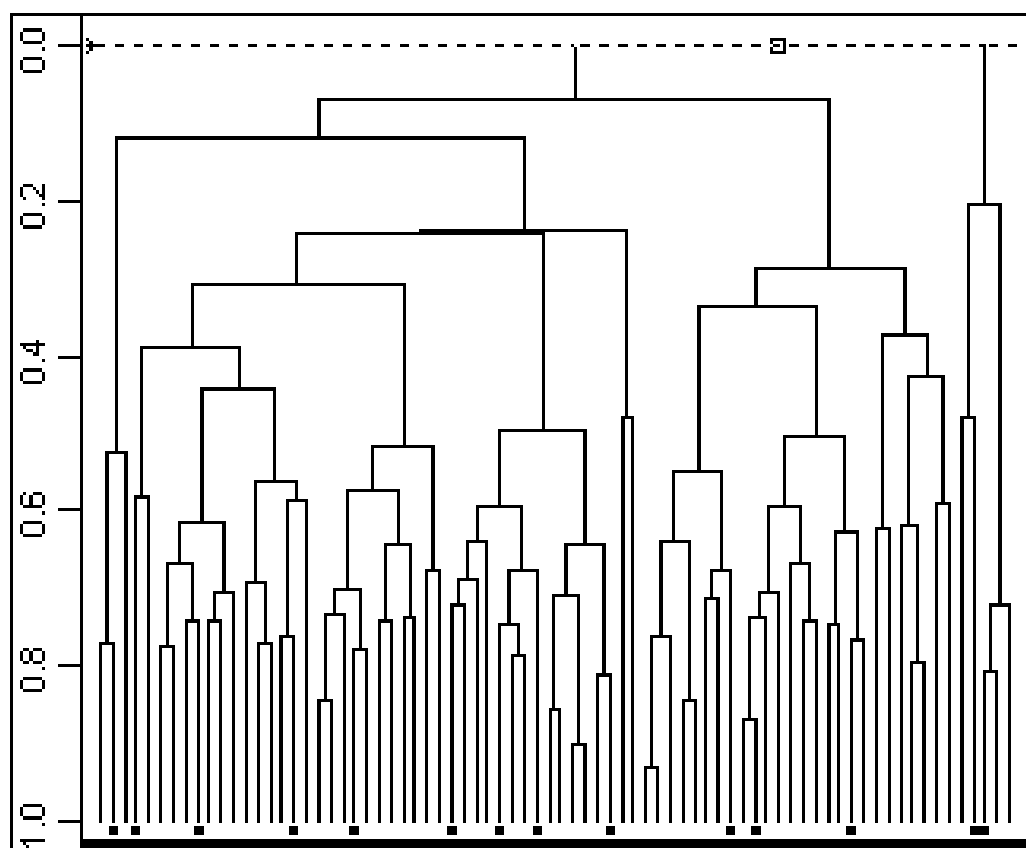

Supplement: Supplementary file 1 [file 4145827]
